# Supplementary material
Source: PubMed Central journal article supplement (PMC6776896)

## APPENDIX

Table of content

Appendix Figure Legends

Appendix Table S1

Appendix Table S2

Appendix Table S3

Appendix Table S4

Appendix Table S5

Appendix References

Appendix Figure S1, related to Figure 2

Appendix Figure S2, related to Figure 3

Appendix Figure S3, related to Figure 4

### **Appendix Figure S1. Efficiency of Rab35 depletion and location of RAB35 mutations in knockout NIH3T3 cell lines**

A, B hTERT-RPE1 (A) or IMCD3 (B) cells were transfected with two independent siRNAs targeting human RAB35 (RAB35-1, RAB35-2) or a pool of siRNAs targeting mouse Rab35, respectively. Knockdown efficiency was determined by qPCR. Graphs show relative mRNA levels remaining compared to cells transfected with non-targeting siRNA control (Neg). Data points are means  $\pm$  S.E.M. of 3 independent experiments.

C Sequence analysis of the Rab35 knockout (KO) NIH3T3 cell lines. The position of the target and PAM sequences of the 2 different sgRNA guides are indicated. Note that for both Rab35 KO cell lines 4 different alleles were detected. This is in agreement with the near tetraploid karyotype of the NIH3T3 cell line (Leibiger et al. 2013), which contains 4 copies of chromosome 5, on which the Rab35 gene is located.

### **Appendix Figure S2. Depletion of Rab35 GEF and GAP regulators**

A hTERT-RPE1 cells were transfected with siRNAs targeting DENND1A, DENND1B, TBC1D10A or TBC1D10B. Depletion efficiency was determined by qPCR. Graphs show relative mRNA levels remaining compared to cells transfected with non-targeting siRNA control (Neg). Data points are means  $\pm$  S.E.M. of 3 independent experiments.

B Representative images of hTERT-RPE1 cells transfected with indicated siRNAs that were serum-starved for 48 h and stained for acetylated tubulin (acetyl. tub.) and DNA. Regions within white boxes shown at higher magnifications in smaller panels. Scale bars; 10  $\mu$ m.

C, D Localisation of transiently expressed GFP-DENND1A (C) or GFP-TBC1D10B (D) in hTERT-RPE1 cells after 24 h serum starvation and staining for DNA and polyglutamylated

tubulin (polyglu. tub.) or acetylated tubulin (acetyl. tub.), respectively. Higher magnification images of the cilia region are shown in smaller panels. Scale bars; 10  $\mu$ m.

**Appendix Figure S3. Dose dependence effect of Rab35 MO in zebrafish development and KV cilia number in Rab35 morphants**

A Death rate of embryos injected with 140 or 280  $\mu$ M of Rab35 Morpholino (Rab35 MO), compared with wild type non-injected embryos (WT).

B, C Effects of Rab35 MO on the heart and liver positioning of zebrafish embryos treated with 140 or 280  $\mu$ M of MO, compared with wild type non-injected embryos (WT), scored at 30 hpf and 53 hpf respectively. Values are expressed as percentages (n = 3).

D Organ situs determined by observing the heart position at 30 hpf, and the liver position at 53 hpf, by *in situ* hybridisation with a probe for *foxa3*, in non-injected (WT) controls or Rab35 MO. *Situs solitus* means left heart and liver; *Situs inversus* means right heart and liver. Heterotaxia means any other possible combination of the heart and liver position.

E Quantification of the number of cilia per KV in Rab35 MO at 8 somite stage from confocal images of Fig. 4D, compared with the non-injected (WT) or mismatch MO controls. Data shown as box-and-whisker plot of n > 20 embryos per condition from 3 independent experiments.

**Appendix Table S1. Plasmid vectors used in this study**

| No. | Vectors         | Inserts                                                             |
|-----|-----------------|---------------------------------------------------------------------|
| 1   | pEGFP-C1        | Human RAB35                                                         |
| 2   | pEGFP-C1        | Human RAB35 (rescue construct resistant to siRNA s21707 and s21708) |
| 3   | pEGFP-C1        | Human RAB35-S22N                                                    |
| 4   | pEGFP-C1        | Human RAB35-Q67L                                                    |
| 5   | pENTR-D-TOPO-C1 | Mouse RAB35                                                         |
| 6   | pENTR-D-TOPO-C1 | Mouse RAB35-Q67L                                                    |
| 7   | pENTR-D-TOPO-C1 | Mouse RAB35-S22N                                                    |
| 8   | pEGFP-C1        | Human DENND1A                                                       |
| 9   | pEGFP-C1        | Human DENND1B                                                       |
| 10  | pEGFP-C1        | Human TBC1D10A                                                      |
| 11  | pEGFP-C1        | Human TBC1D10B                                                      |
| 12  | pmCherry-C1     | Human RAB35                                                         |
| 14  | p3XFLAG-CMV-14  | Human ARL13B                                                        |
| 15  | pEGFP-N1        | Human ARL13B                                                        |
| 16  | pEGFP-N1        | Human ARL13B (C8S, C9S)                                             |
| 19  | pEGFP-N1        | Human ARL13B (V358A)                                                |
| 20  | pEGFP-N1        | Human ARL13B (1-197 aa)                                             |
| 21  | pEGFP-N1        | Human ARL13B (1-250 aa)                                             |

|    |                     |                               |
|----|---------------------|-------------------------------|
| 22 | pEGFP-N1            | Human ARL13B (245-425aa)      |
| 23 | pEGFP-N1            | Human ARL13B ( $\Delta$ RVEP) |
| 24 | pEGFP-N1            | Human ARL13B ( $\Delta$ PR)   |
| 25 | pCS2 (+)            | mCherry                       |
| 26 | pCS2 (+)-mCherry-N1 | Mouse RAB35 WT                |
| 27 | pCS2 (+)-mCherry-N1 | Mouse RAB35-Q67L              |
| 28 | pCS2 (+)-mCherry-N1 | Mouse RAB35-S22N              |
| 29 | PX459 V2            | Mouse Rab35 guide 1           |
| 30 | PX459 V2            | Mouse Rab35 guide 2           |
| 31 | pDEST-tRFP7         | Human HTR6                    |
| 32 | pEGFP-N1            | PH-PLC $\delta$               |

**Appendix Table S2. Antibodies used in this study**

| <b>Antibodies</b>                               | <b>Source</b>                                   | <b>Clone or Catalog number</b> | <b>Dilution (purpose)</b>  |
|-------------------------------------------------|-------------------------------------------------|--------------------------------|----------------------------|
| Monoclonal mouse anti-acetyl- $\alpha$ -tubulin | Sigma-Aldrich                                   | 6-11B-1                        | 1:5000 (IF)                |
| Monoclonal mouse anti-acetyl- $\alpha$ -tubulin | Gift from G. Pereira                            | C3B9                           | 1:250 - 500 (IF)           |
| Monoclonal mouse anti- $\beta$ -tubulin         | CST                                             | 86298T                         | 1:1000 (IB)                |
| Monoclonal mouse anti-EHD                       | Santa Cruz                                      | sc-390513                      | 1:200 (IF)                 |
| Monoclonal mouse anti-FLAG                      | Sigma-Aldrich                                   | F3165                          | 1:5000 (IB)                |
| Monoclonal mouse anti- $\gamma$ -tubulin        | Sigma-Aldrich                                   | GTU88                          | 1:1000 (IF)                |
| Monoclonal mouse anti-mCherry/RFP               | Chromotek                                       | 6G6                            | 1:1000 (IB)                |
| Monoclonal mouse anti-polyglu. tubulin          | Adipogen                                        | GT335                          | 1:1000 (IF)                |
| Monoclonal mouse anti-SMO                       | Santa Cruz                                      | sc-166685                      | 1:100 (IF)                 |
| Monoclonal rat anti-ARL13B                      | Gift from K. Kontani                            | 1E8                            | 1:100 (IF)                 |
| Monoclonal rat anti-GFP                         | Santa Cruz                                      | sc-101536                      | 1:500 (IF)                 |
| Polyclonal goat anti-GAPDH                      | SicGen                                          | AB0049-200                     | 1:5000 (IB)                |
| Polyclonal guinea pig anti-IFT88                | Gift from G. Pereira<br>(Kurtulmus et al. 2016) |                                | 1:500 (IF)                 |
| Polyclonal rabbit anti-ARL13B                   | Proteintech                                     | 17711-1-AP                     | 1:3000 (IF)<br>1:2500 (IB) |
| Polyclonal rabbit Anti-Arl13b                   | Gift from T.Caspary                             |                                | 1:800 (IF)                 |
| Polyclonal rabbit anti-DsRed-mCherry            | Clontech                                        | 632496                         | 1:300 (IF)                 |
| Polyclonal rabbit anti-GFP                      | Life Technology                                 | A11122                         | 1:800 (IF)                 |
| Polyclonal rabbit anti-GFP                      | Santa Cruz                                      | sc-8334                        | 1:500 (IB)                 |
| Polyclonal rabbit anti-INPP5E                   | Proteintech                                     | 17797-1-AP                     | 1:500 (IF)                 |
| Polyclonal rabbit anti-RAB35                    | Proteintech                                     | 11329-2-AP                     | 1:500 (IB)                 |
| Polyclonal rabbit anti-Rab35                    | From A.Echard<br>(Kouranti et al. 2006)         |                                | 1:500 (IB)                 |
| Cy3-conjugated anti-acetyl- $\alpha$ -tubulin   | Gift from G. Pereira<br>(Kuhns et al. 2013)     | Cy3-C3B9                       | 1:500 (IF)                 |
| Atto488-conjugated anti-GFP                     | Chromotek                                       | gba488-10                      | 1:500 (IF)                 |

|                                  |                  |                                                                                |                   |
|----------------------------------|------------------|--------------------------------------------------------------------------------|-------------------|
| AlexaFluor-conjugated secondary  | Molecular Probes | A11029, A11031, A11034, A11036, A11075, A21208, A21127, A21236, A21240, A21245 | 1:500 - 1000 (IF) |
| DyLight 650-conjugated secondary | Invitrogen       | SA5-10029                                                                      | 1:500 (IF)        |
| HRP-conjugated secondary         | CST              | 7074, 7076                                                                     | 1:2000 (IB)       |
| HRP-conjugated secondary         | GE               |                                                                                | 1:5000 (IB)       |

**Appendix Table S3. Oligo DNAs used in this study**

| No. | Names                 | Sequence                                 |
|-----|-----------------------|------------------------------------------|
| 1   | mCherry-Zebrafish-FW  | tcaagcttcgaaatggcaaaagcaacaactattaagaggc |
| 2   | mCherry-Zebrafish-Rev | cgctggatccttaactctcccctcagttcc           |
| 3   | Rab35- FW             | gcgcccggccctcgaggccccgcccgcct            |
| 4   | Rab35-Rev             | agtgggggtacctctagcacacaggtatgagg         |
| 5   | qPCR mGAPDH-F         | aacttggcattgtggaagg                      |
| 6   | qPCR mGAPDH-R         | acacattggggtaggaaca                      |
| 7   | qPCR hGAPDH-F         | agccacatcgctcagacac                      |
| 8   | qPCR hGAPDH-R         | gcccaatacgaccaatcc                       |
| 9   | qPCR mRAB35-F         | ttcaagattcggactgtggag                    |
| 10  | qPCR mRAB35-R         | tcgtaaaccacaatgacccc                     |
| 11  | qPCR hRAB35-F         | aagctgcagatctgggaca                      |
| 12  | qPCR hRAB35-R         | gggtccccgataatacg                        |
| 13  | qPCR DENND1A-F        | agaactcccagcatacctgag                    |
| 14  | qPCR DENND1A-R        | ctggcgtacagatgcaacat                     |
| 15  | qPCR DENND1B-F        | gcgtgatgaaacagttcctg                     |
| 16  | qPCR DENND1B-R        | ccagtcgaccatcgataaact                    |
| 17  | qPCR TBC1D10A-F       | gatcatgcaggaggccttt                      |

|    |                 |                                   |
|----|-----------------|-----------------------------------|
| 18 | qPCR TBC1D10A-R | ctcaatctggcgctctgtc               |
| 19 | qPCR TBC1D10B-F | acctcccagggttactacagtgc           |
| 20 | qPCR TBC1D10B-R | aaaaagatctccccgtccag              |
| 21 | Rab35S22N-F     | gcggtgtgggcaagaacagttactgttgcg    |
| 22 | Rab35S22N-R     | cgcaacagtaaaactgttcttggcccacaccgc |
| 23 | Rab35Q67L-F     | cacagcggggctggagcgttcc            |
| 24 | Rab35Q67L-F     | ggaagcgtccagccccgctgtg            |



**Appendix Table S4. siRNAs used in this study**

| Name        | siRNA ID         | Sense siRNA Sequence                 |
|-------------|------------------|--------------------------------------|
| Neg         | s813             | UAACGACGCGACGACGUAAtt                |
| RAB35-1     | s21708           | GAAGAGAUGUUCAACUGCAtt                |
| RAB35-2     | s21707           | GCAGUUUACUGUUGCGUUUtt                |
| ARL13B      | s47283           | GAGCUGAACGAGUGCGAAAtt                |
| DENND1A-1   | s33637           | GCAGUUUAUUGAUGGUCGAtt                |
| DENND1A-2   | s33638           | GGUUCGAGGUAUUUUUAUAAtt               |
| DENND1B-1   | s46460           | GUGUAUUACAAGCUUCUAAtt                |
| DENND1B-2   | s46461           | GAGAUGCACUGAGAUACAAtt                |
| TBC1D10A-1  | s38253           | GUAGUGGAGUUGCCCGUGAtt                |
| TBC1D10A-2  | s38254           | GGCUAUCUUGGAUGCAGAAtt                |
| TBC1D10B-1  | s24905           | CCUGUCUAAUAGCAAGGAAtt                |
| TBC1D10B-2  | s24906           | CGGCGAUUCCAGAAGGUGAtt                |
| mRab35 pool | M-042604-00-0005 | siGENOME mouse RAB35 siRNA           |
| Neg Control | D-001206-14-05   | siGENOME Non-Targeting siRNA Pool #2 |

**Appendix Table S5. Morpholinos used in this study**

|             |           |                           |
|-------------|-----------|---------------------------|
| Mismatch MO | Genetools | TGgAcCTTgACcCCTCTCTCCAcCA |
| Rab35 MO    | Genetools | TGCAGCTTCACGCCTCTCTCCAGCA |

## Appendix References

- Leibiger, Christine, Nadezda Kosyakova, Hasmik Mkrtychyan, Michael Gleib, Vladimir Trifonov, and Thomas Liehr. 2013. "First Molecular Cytogenetic High Resolution Characterization of the NIH 3T3 Cell Line by Murine Multicolor Banding." *The Journal of Histochemistry and Cytochemistry: Official Journal of the Histochemistry Society* 61 (4): 306–12.
- Kouranti, Ilektra, Martin Sachse, Nassim Arouche, Bruno Goud, and Arnaud Echard. 2006. "Rab35 Regulates an Endocytic Recycling Pathway Essential for the Terminal Steps of Cytokinesis." *Current Biology: CB* 16 (17): 1719–25.
- Kuhns, Stefanie, Kerstin N. Schmidt, Jürgen Reymann, Daniel F. Gilbert, Annett Neuner, Birgit Hub, Ricardo Carvalho, et al. 2013. "The Microtubule Affinity Regulating Kinase MARK4 Promotes Axoneme Extension during Early Ciliogenesis." *The Journal of Cell Biology* 200 (4): 505–22.
- Kurtulmus, Bahtiyar, Wenbo Wang, Thomas Ruppert, Annett Neuner, Berati Cerikan, Linda Viol, Rafael Dueñas-Sánchez, Oliver J. Gruss, and Gislene Pereira. 2016. "WDR8 Is a Centriolar Satellite and Centriole-Associated Protein That Promotes Ciliary Vesicle Docking during Ciliogenesis." *Journal of Cell Science* 129 (3): 621–36.



# Appendix Figure S2

**A**

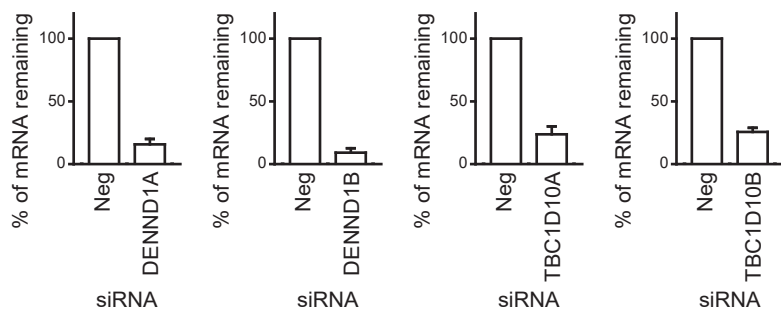

**B**

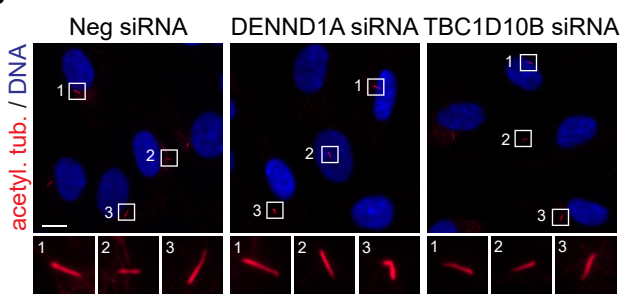

**C**

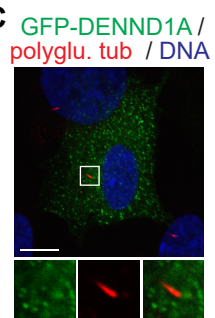

**D**

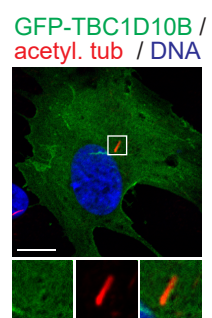

# Appendix Figure S3

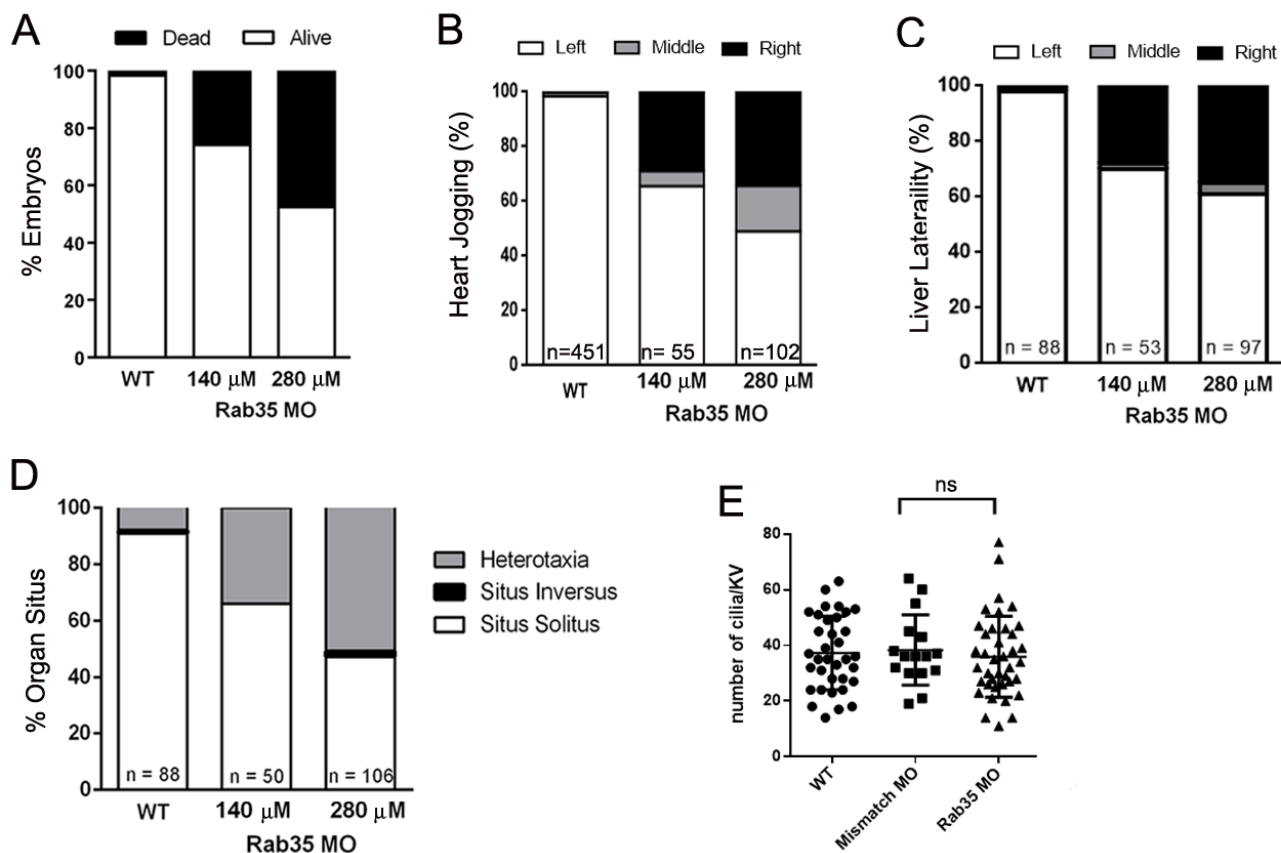

Supplement: EMBR-20-e47625-s001.pdf [file EMBR-20-e47625-s001.pdf]
