# Supplementary material
Source: PubMed Central journal article supplement (PMC6776896)

# Source Data for Figure 2

Fig. 2A

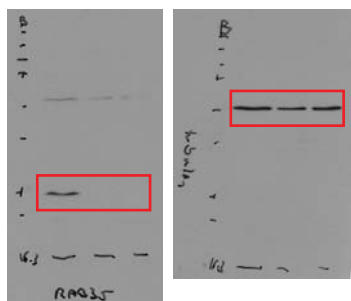

Fig. 2I

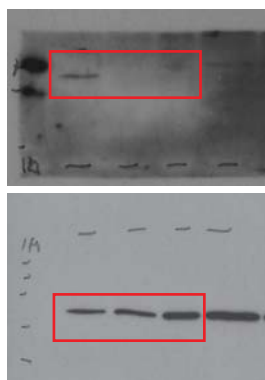

Fig. 2E

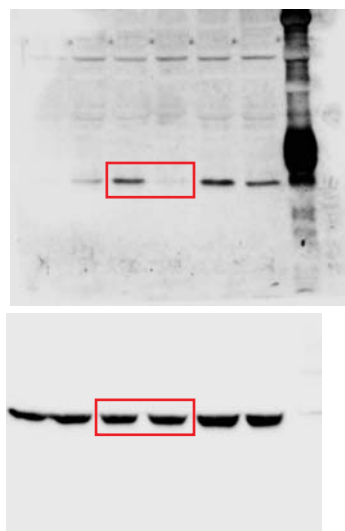

Supplement: EMBR-20-e47625-s003.pdf [file EMBR-20-e47625-s003.pdf]

# Source Data for Figure 4

Fig. 4B

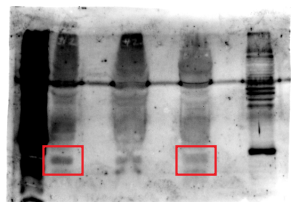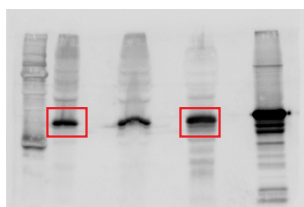

Supplement: EMBR-20-e47625-s004.pdf [file EMBR-20-e47625-s004.pdf]

# Source Data for Figure 5

Fig. 5C

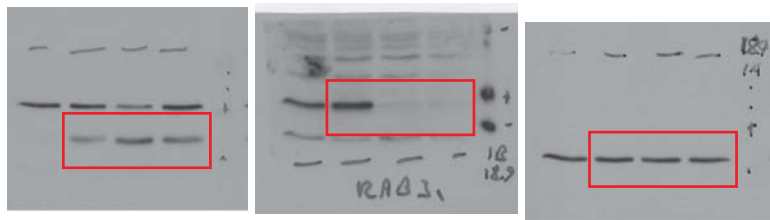

Fig. 5F

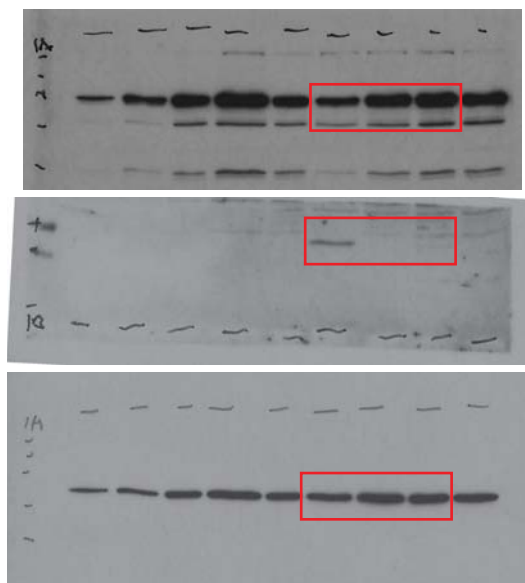

Supplement: EMBR-20-e47625-s005.pdf [file EMBR-20-e47625-s005.pdf]

# Source Data for Figure 6

Fig. 6A

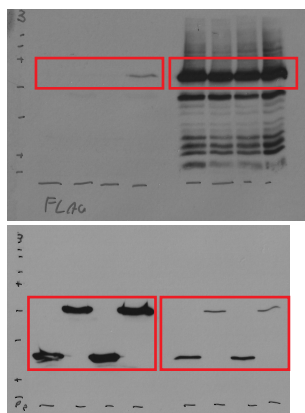

Fig. 6C

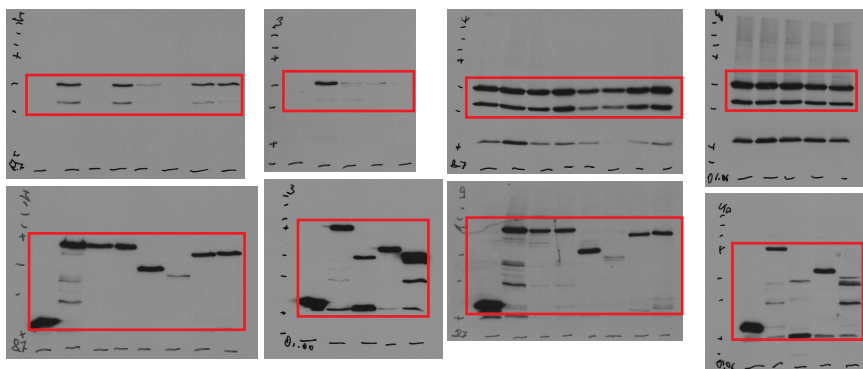

Fig. 6D

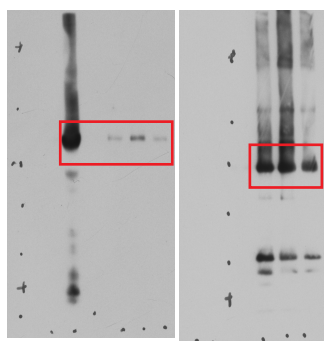

Fig. 6E

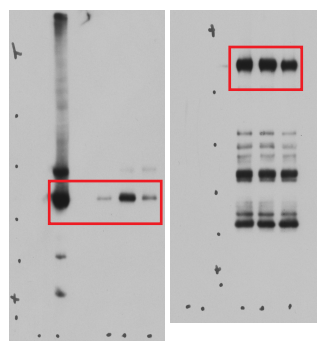

Supplement: EMBR-20-e47625-s006.pdf [file EMBR-20-e47625-s006.pdf]
